# Supplementary material
Source: MDPI journal article supplement (https://www.mdpi.com/2073-4441/13/15/2051)
Supplement: s1 [file s1]

Supplement S1

Rainfall, river discharge and water stable isotope data at Ha Noi Site

| Year | Month | $\delta^{18}\text{O}_{\text{rain}}$ | Rainfall (mm) | $\delta^{18}\text{O}_{\text{river}}$ | Discharge ( $\text{m}^3 \text{s}^{-1}$ ) |
|------|-------|-------------------------------------|---------------|--------------------------------------|------------------------------------------|
| 2003 | 1     | -6.85                               | 17            | -8.66                                | 1393                                     |
|      | 2     | -3.90                               | 12            | -7.97                                | 1014                                     |
|      | 3     | -1.23                               | 30            | -8.22                                | 1177                                     |
|      | 4     | -2.30                               | 66            | -7.91                                | 1129                                     |
|      | 5     | -4.30                               | 195           | -6.98                                | 1640                                     |
|      | 6     | -4.82                               | 410           | -7.18                                | 2444                                     |
|      | 7     | -10.13                              | 80            | -8.32                                | 5039                                     |
|      | 8     | -9.26                               | 325           | -8.95                                | 4349                                     |
|      | 9     | -9.82                               | 309           | -9.26                                | 4245                                     |
|      | 10    | -4.53                               | 38            | -8.37                                | 1861                                     |
|      | 11    | -3.77                               | 39            | -8.91                                | 1137                                     |
| 2004 | 12    | -1.30                               | 39            | -8.53                                | 939                                      |
|      | 1     | -4.71                               | 15            | -8.26                                | 892                                      |
|      | 2     | -4.25                               | 24            | -8.20                                | 1009                                     |
|      | 3     | -3.51                               | 45            | -8.14                                | 964                                      |
|      | 4     | -3.87                               | 161           | -7.76                                | 1343                                     |
|      | 5     | -6.37                               | 335           | -6.93                                | 2680                                     |
|      | 6     | -5.98                               | 229           | -8.40                                | 3214                                     |
|      | 7     | -9.19                               | 350           | -8.69                                | 5108                                     |
|      | 8     | -7.84                               | 378           | -8.91                                | 4311                                     |
|      | 9     | -8.58                               | 247           | -9.17                                | 3248                                     |
|      | 10    | -2.68                               | 107           | -8.36                                | 1718                                     |
|      | 11    | -3.54                               | 8             | -9.76                                | 1233                                     |
|      | 12    | -3.36                               | 24            | -8.61                                | 989                                      |
| 2005 | 1     | -1.43                               | 12            | -8.26                                | 928                                      |
|      | 2     | -1.77                               | 36            | -8.03                                | 838                                      |
|      | 3     | -1.31                               | 27            | -8.27                                | 901                                      |
|      | 4     | -2.03                               | 33            | -8.13                                | 939                                      |
|      | 5     | -3.87                               | 223           | -7.68                                | 936                                      |
|      | 6     | -8.11                               | 278           | -8.36                                | 2350                                     |
|      | 7     | -9.83                               | 278           | -8.87                                | 4310                                     |
|      | 8     | -11.00                              | 377           | -8.93                                | 5230                                     |
|      | 9     | -9.69                               | 366           | -9.02                                | 3920                                     |
|      | 10    | -4.14                               | 105           | -8.54                                | 2250                                     |
|      | 11    | -7.54                               | 92            | -8.87                                | 1760                                     |
|      | 12    | -2.45                               | 27            | -8.61                                | 944                                      |
|      |       |                                     |               |                                      |                                          |
| 2014 | 11    |                                     |               | -9.07                                | 1460                                     |
|      | 12    |                                     |               | -8.61                                | 827                                      |
| 2015 | 1     | -6.29                               | 26            | -8.78                                | 1260                                     |

|      |    |        |     |       |      |
|------|----|--------|-----|-------|------|
|      | 2  | -1.41  | 13  | -8.73 | 1080 |
|      | 3  | -1.68  | 59  | -8.41 | 683  |
|      | 4  | -1.57  | 22  | -8.51 | 1360 |
|      | 5  | -4.82  | 74  | -8.04 | 2030 |
|      | 6  | -8.30  | 241 | -7.68 | 1570 |
|      | 7  | -6.56  | 97  | -8.04 | 1340 |
|      | 8  | -8.40  | 287 | -8.78 | 3100 |
|      | 9  | -10.67 | 345 | -9.02 | 2950 |
|      | 10 | -9.01  | 100 | -9.09 | 2330 |
|      | 11 | -3.30  | 158 | -8.47 | 1430 |
|      | 12 | -2.97  | 32  | -8.40 | 1140 |
|      |    |        |     |       |      |
| 2018 | 1  | 0.77   | 17  | -8.19 | 1540 |
|      | 2  | -0.71  | 10  | -7.83 | 1390 |
|      | 3  | 1.39   | 34  | -8.57 | 1030 |
|      | 4  | 1.68   | 59  | -8.68 | 1310 |
|      | 5  | -6.12  | 209 | -7.96 | 1840 |
|      | 6  | -7.46  | 189 | -8.28 | 2650 |
|      | 7  | -11.57 | 428 | -8.29 | 4860 |
|      | 8  | -9.88  | 313 | -9.18 | 5010 |
|      | 9  | -8.21  | 230 | -9.46 | 3990 |
|      | 10 | -5.78  | 94  | -8.98 | 2440 |
|      | 11 | -2.80  | 28  | -8.94 | 1920 |
|      | 12 | -3.64  | 84  | -8.86 | 1390 |
| 2019 | 1  | -1.68  | 21  | -8.64 | 1310 |
|      | 2  | -1.33  | 33  | -8.66 | 1290 |
|      | 3  | -1.10  | 53  | -8.36 | 1010 |
|      | 4  | -2.39  | 99  | -8.35 | 1680 |
|      | 5  | -5.23  | 211 | -7.23 | 2030 |
|      | 6  | -6.55  | 236 | -7.77 | 2320 |
|      | 7  | -8.05  | 279 | -7.87 | 2370 |
|      | 8  | -13.86 | 279 | -8.49 | 2760 |
|      | 9  | -7.38  | 223 | -8.72 | 1930 |
|      | 10 | -5.16  | 146 | -8.33 | 1300 |
|      | 11 | -2.89  | 56  | -8.28 | 1090 |
|      | 12 | -0.56  | 10  | -8.35 | 922  |
